# Supplementary material
Source: Springer Nature journal article supplement (https://www.springermedizin.de/resource/supplementary/12967_2009_435_MOESM2_ESM.pdf/9576500)

**TGF- $\beta$  1****HLA-DR****CD68****HE****IL-10****IL-12**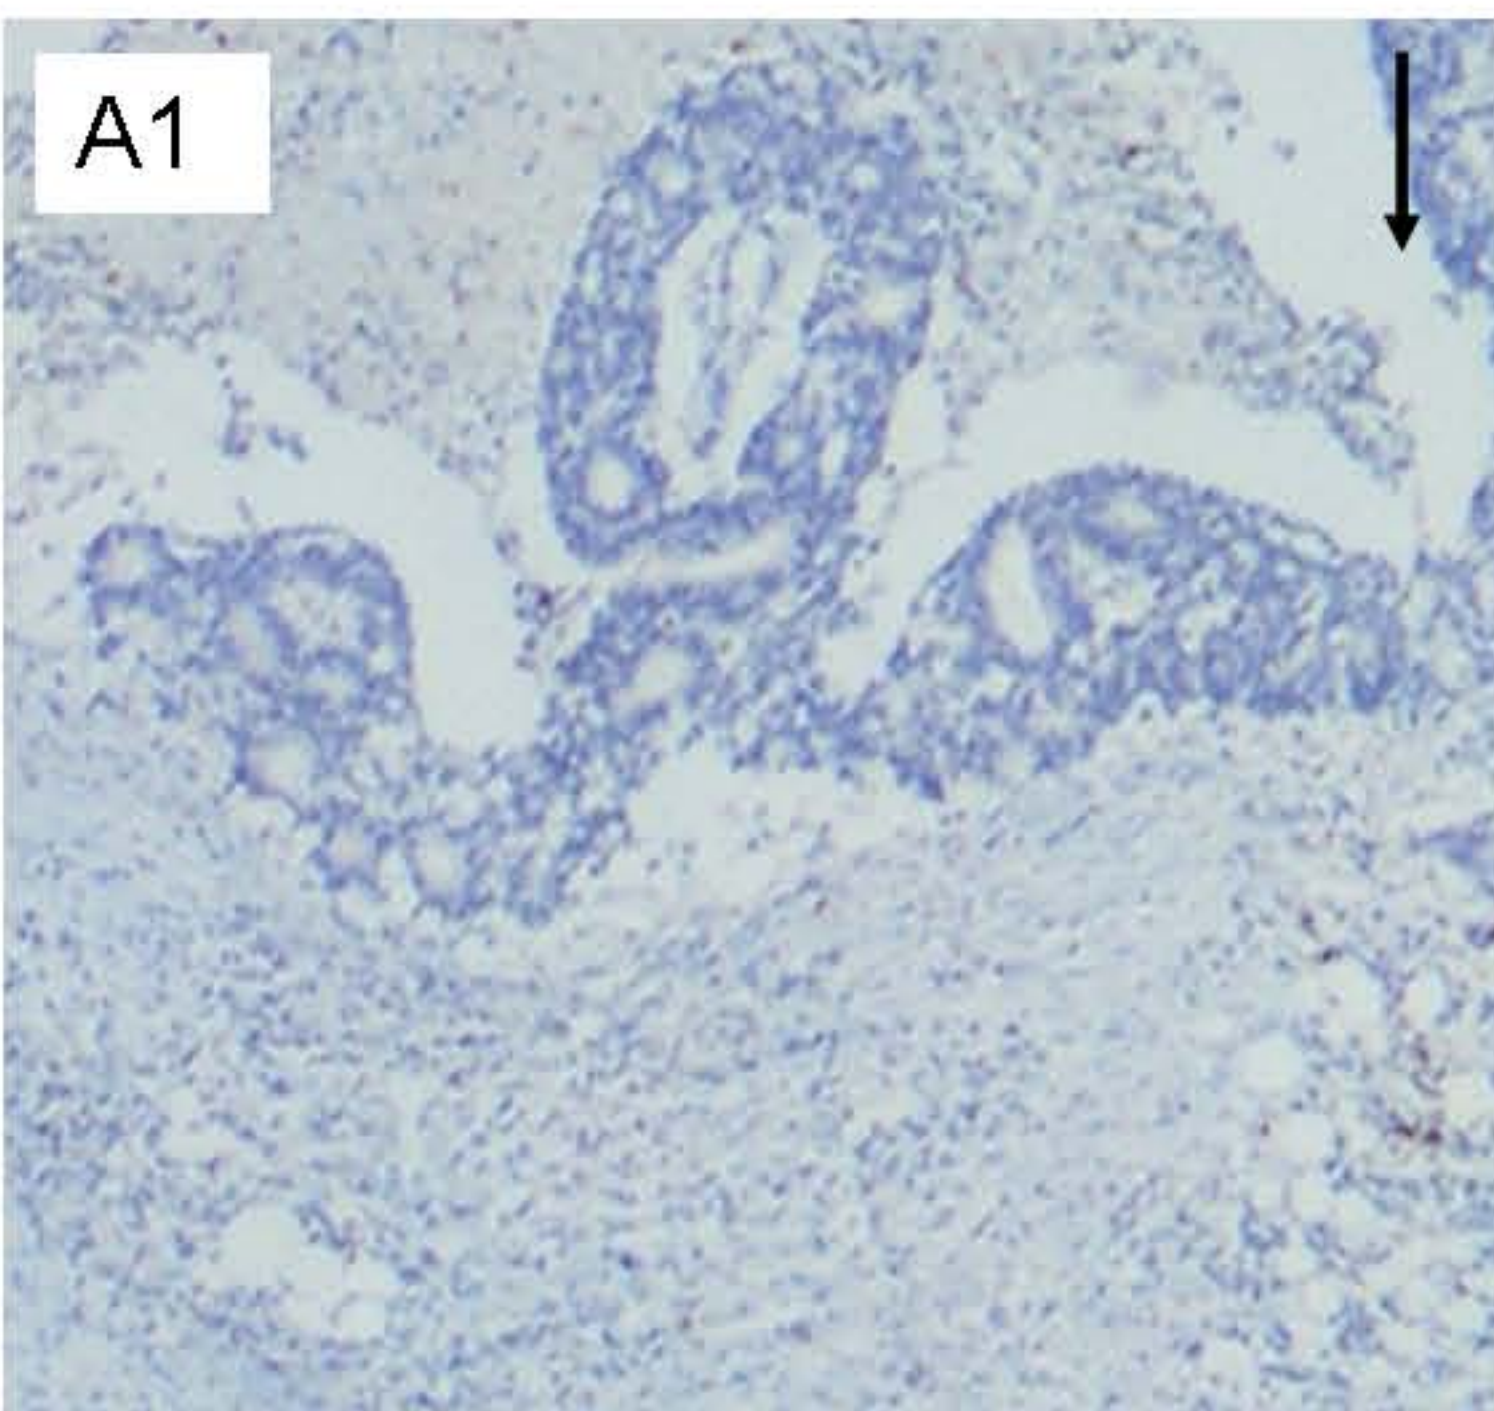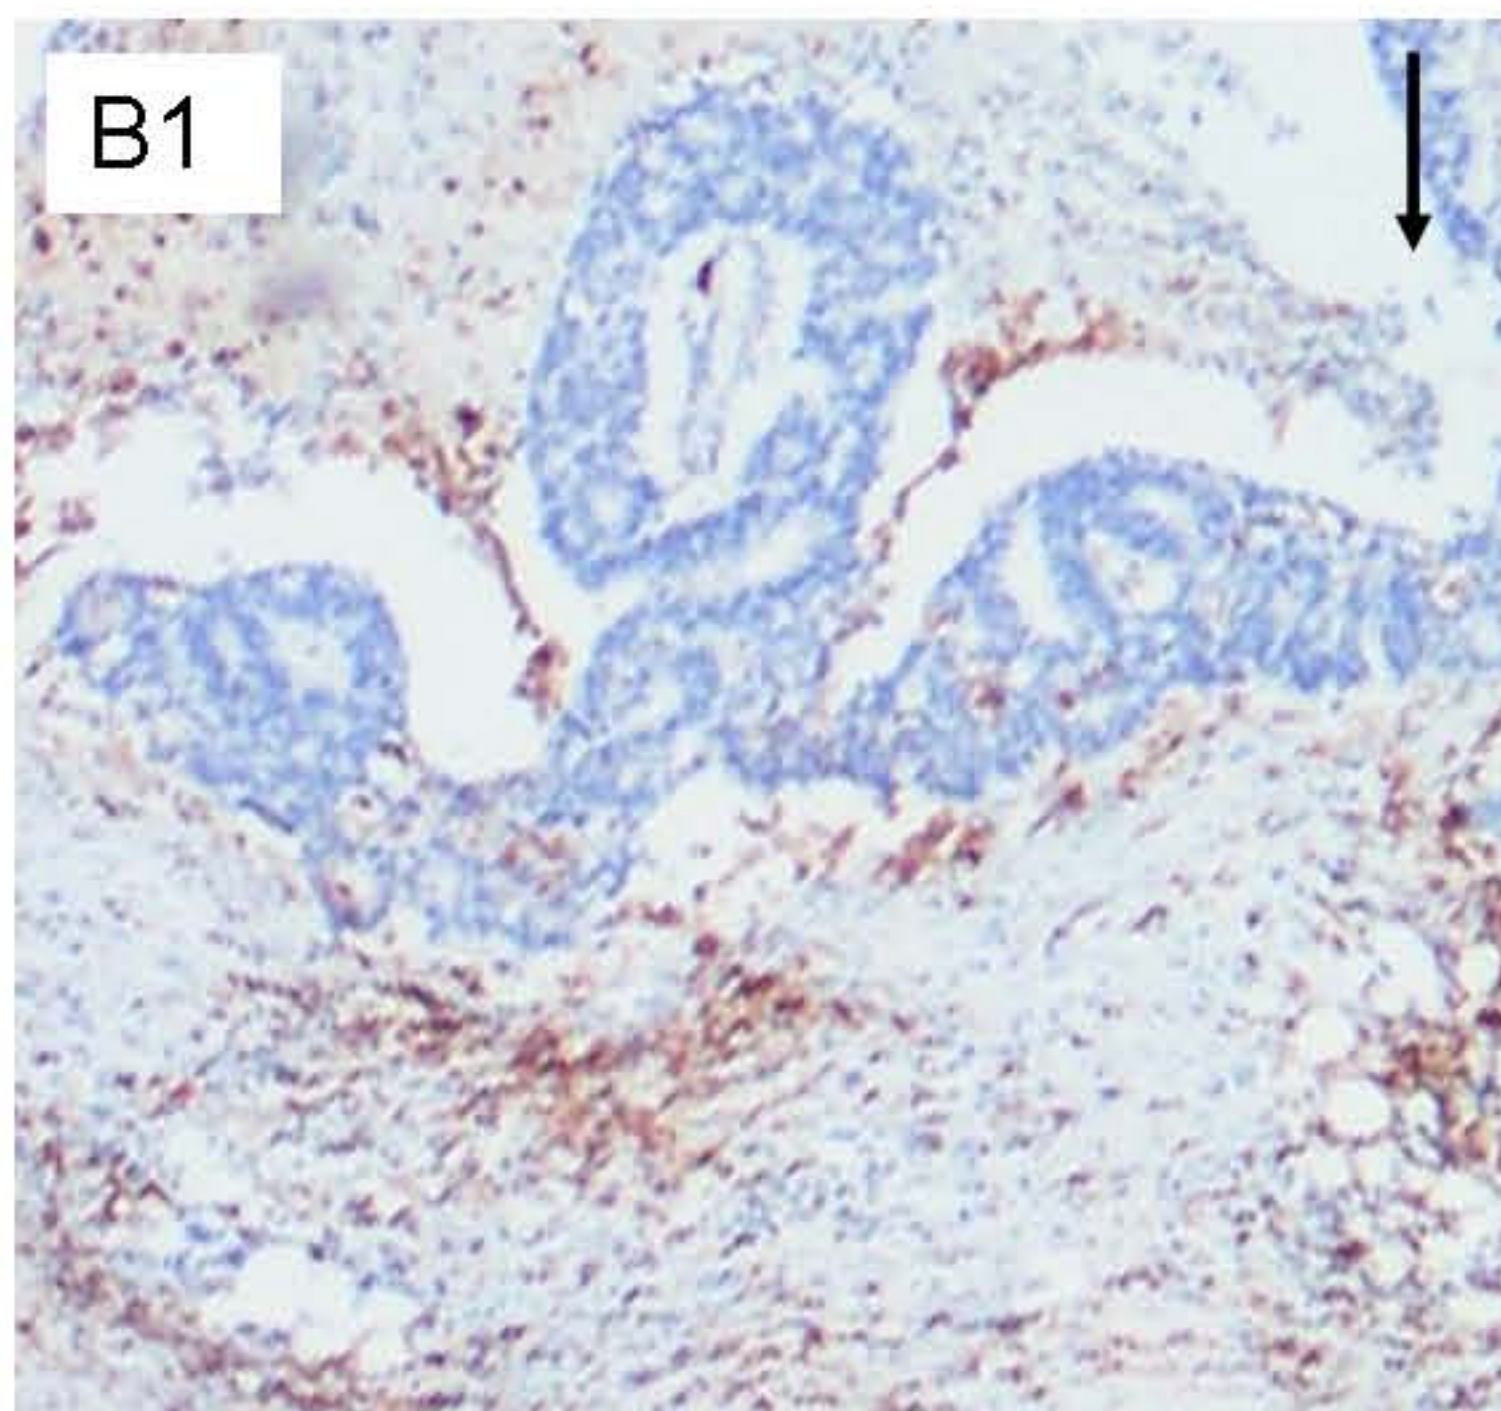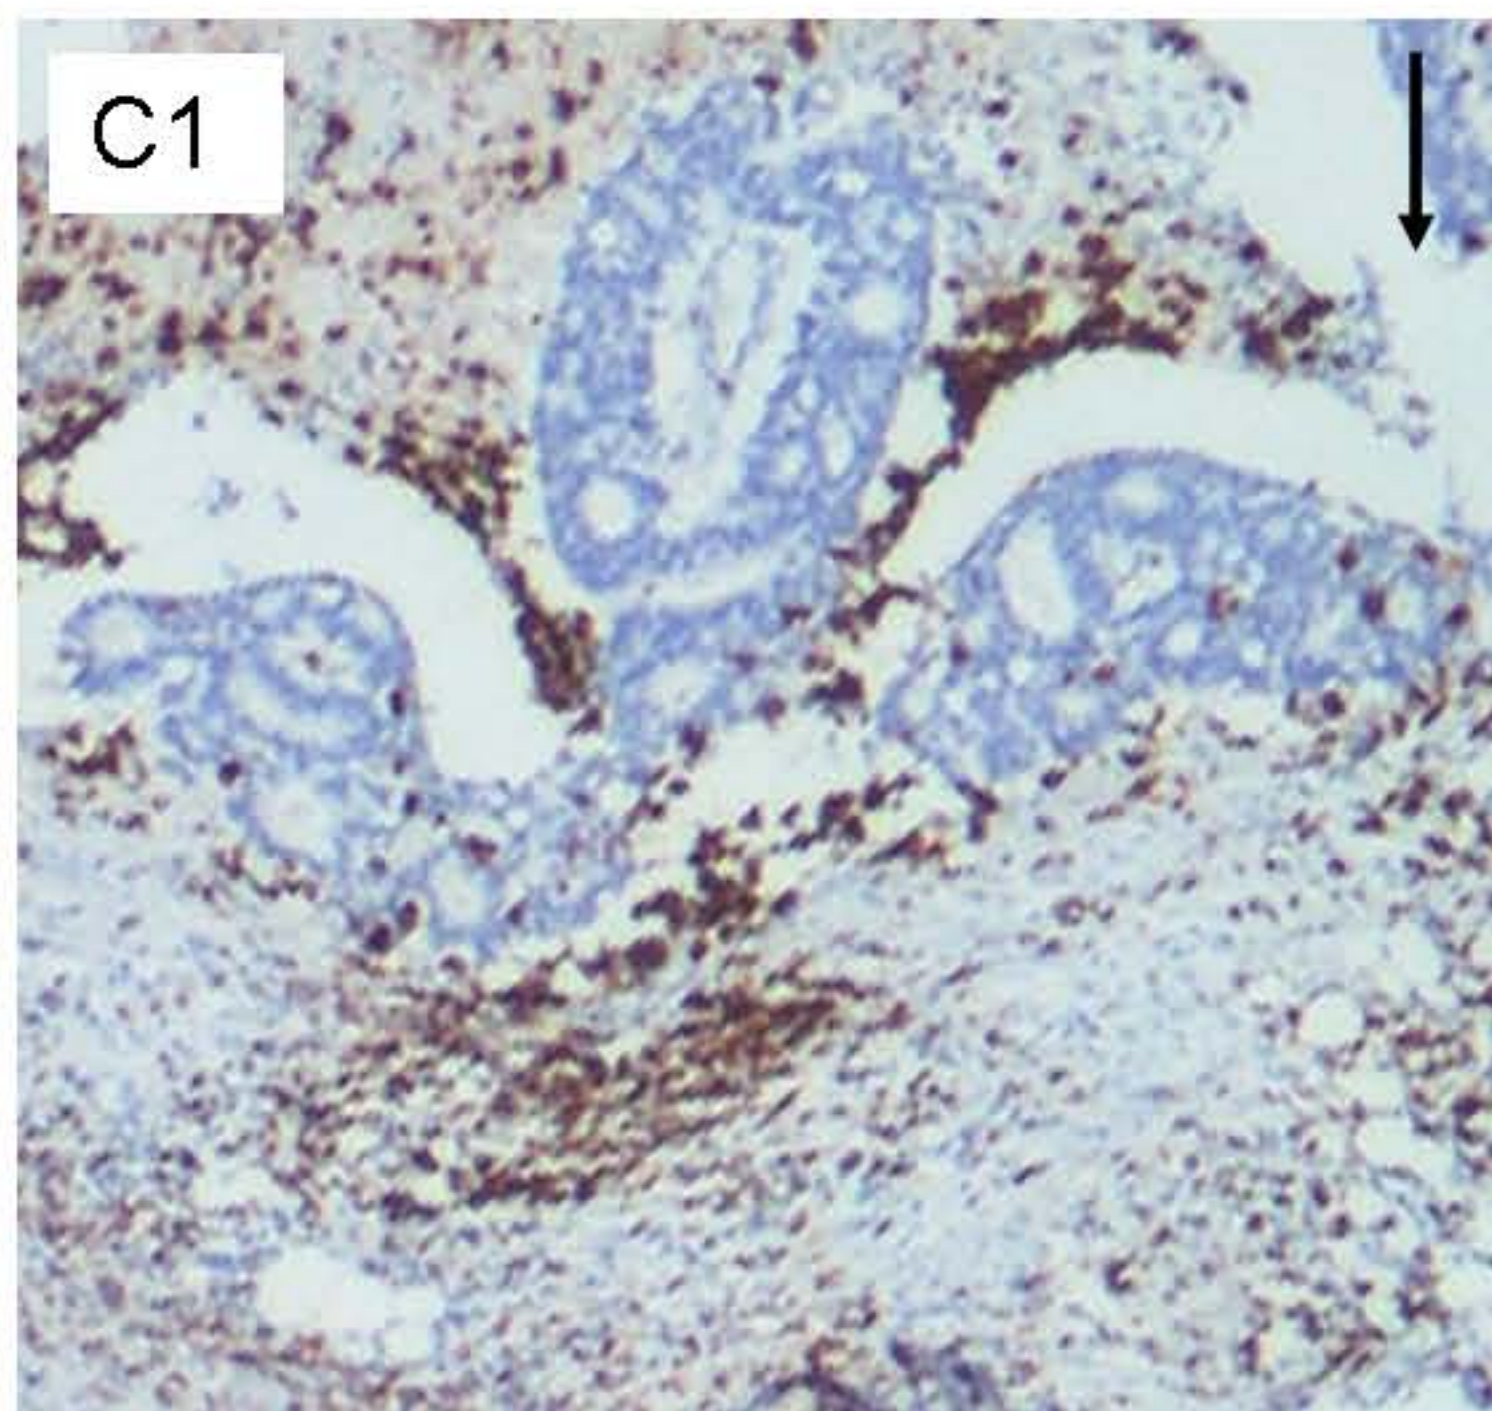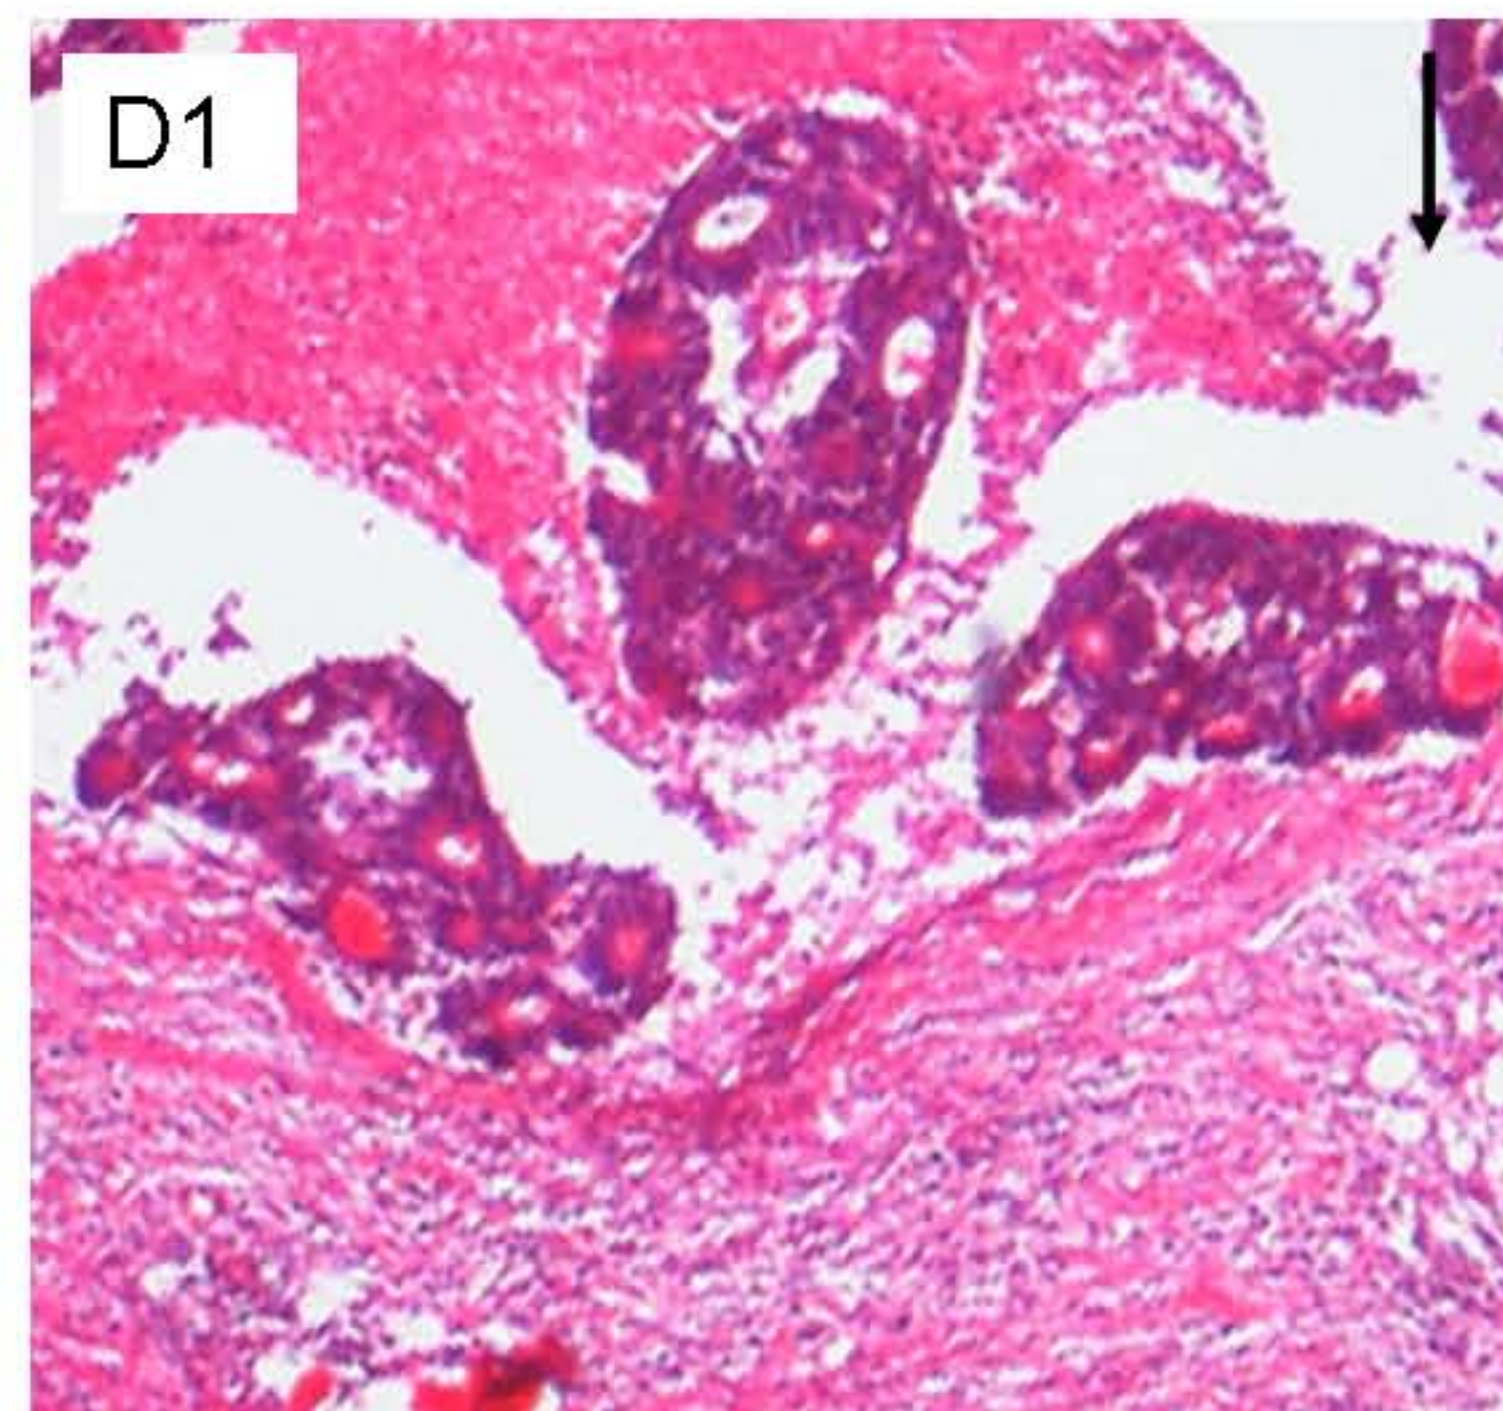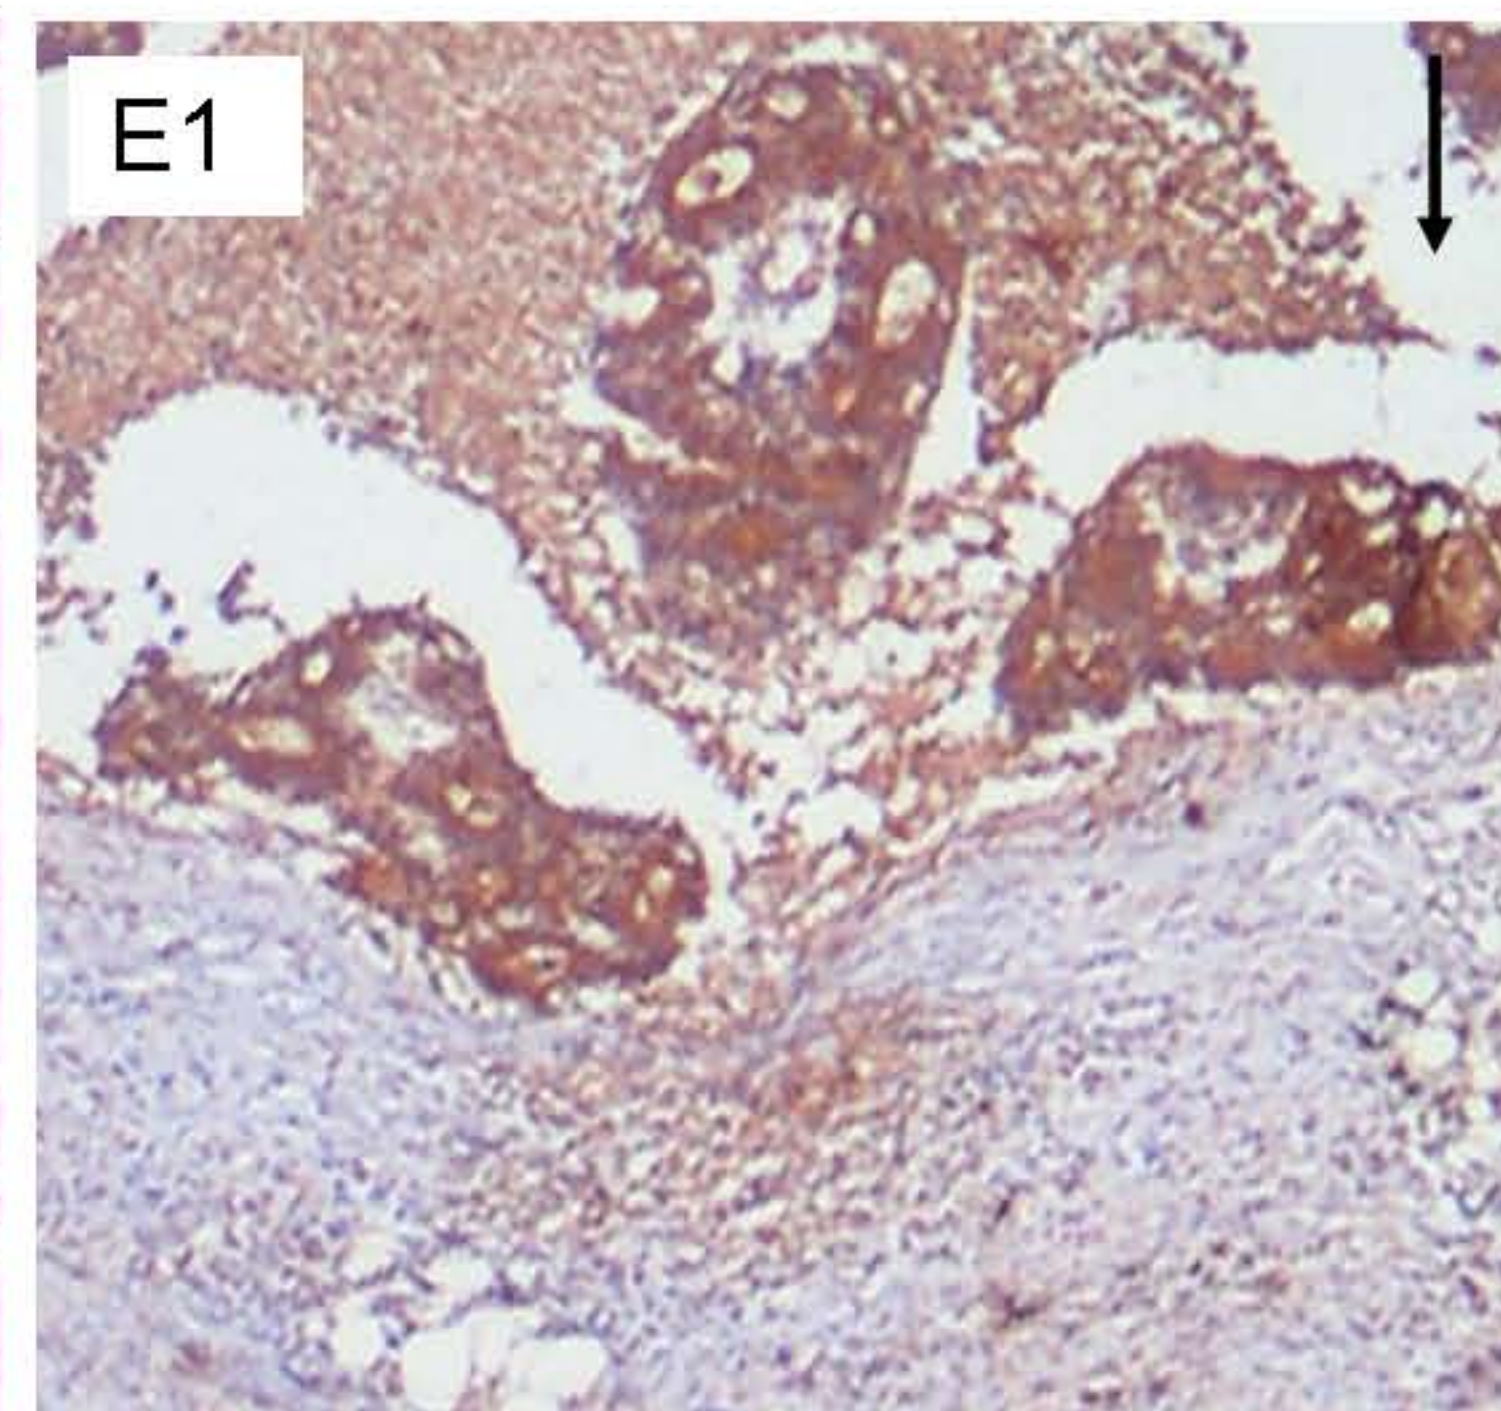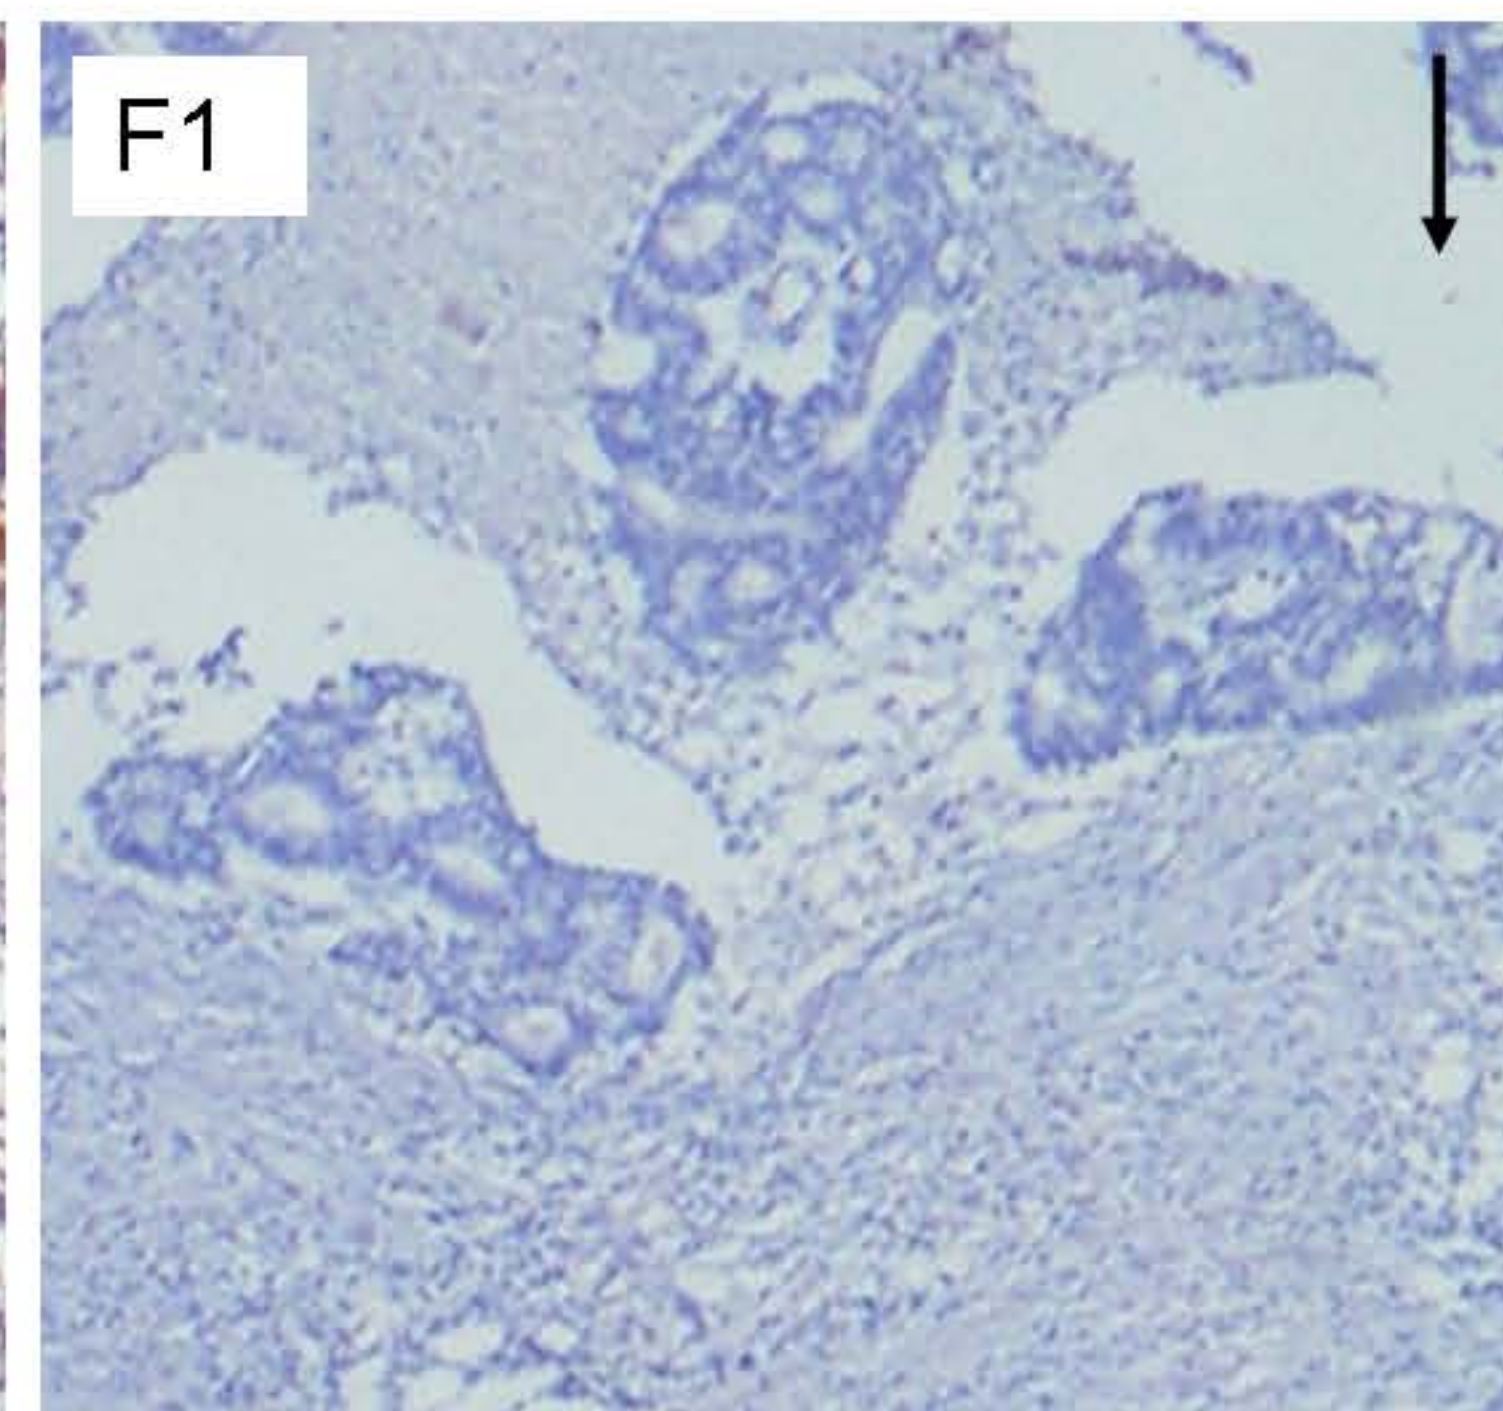**×100**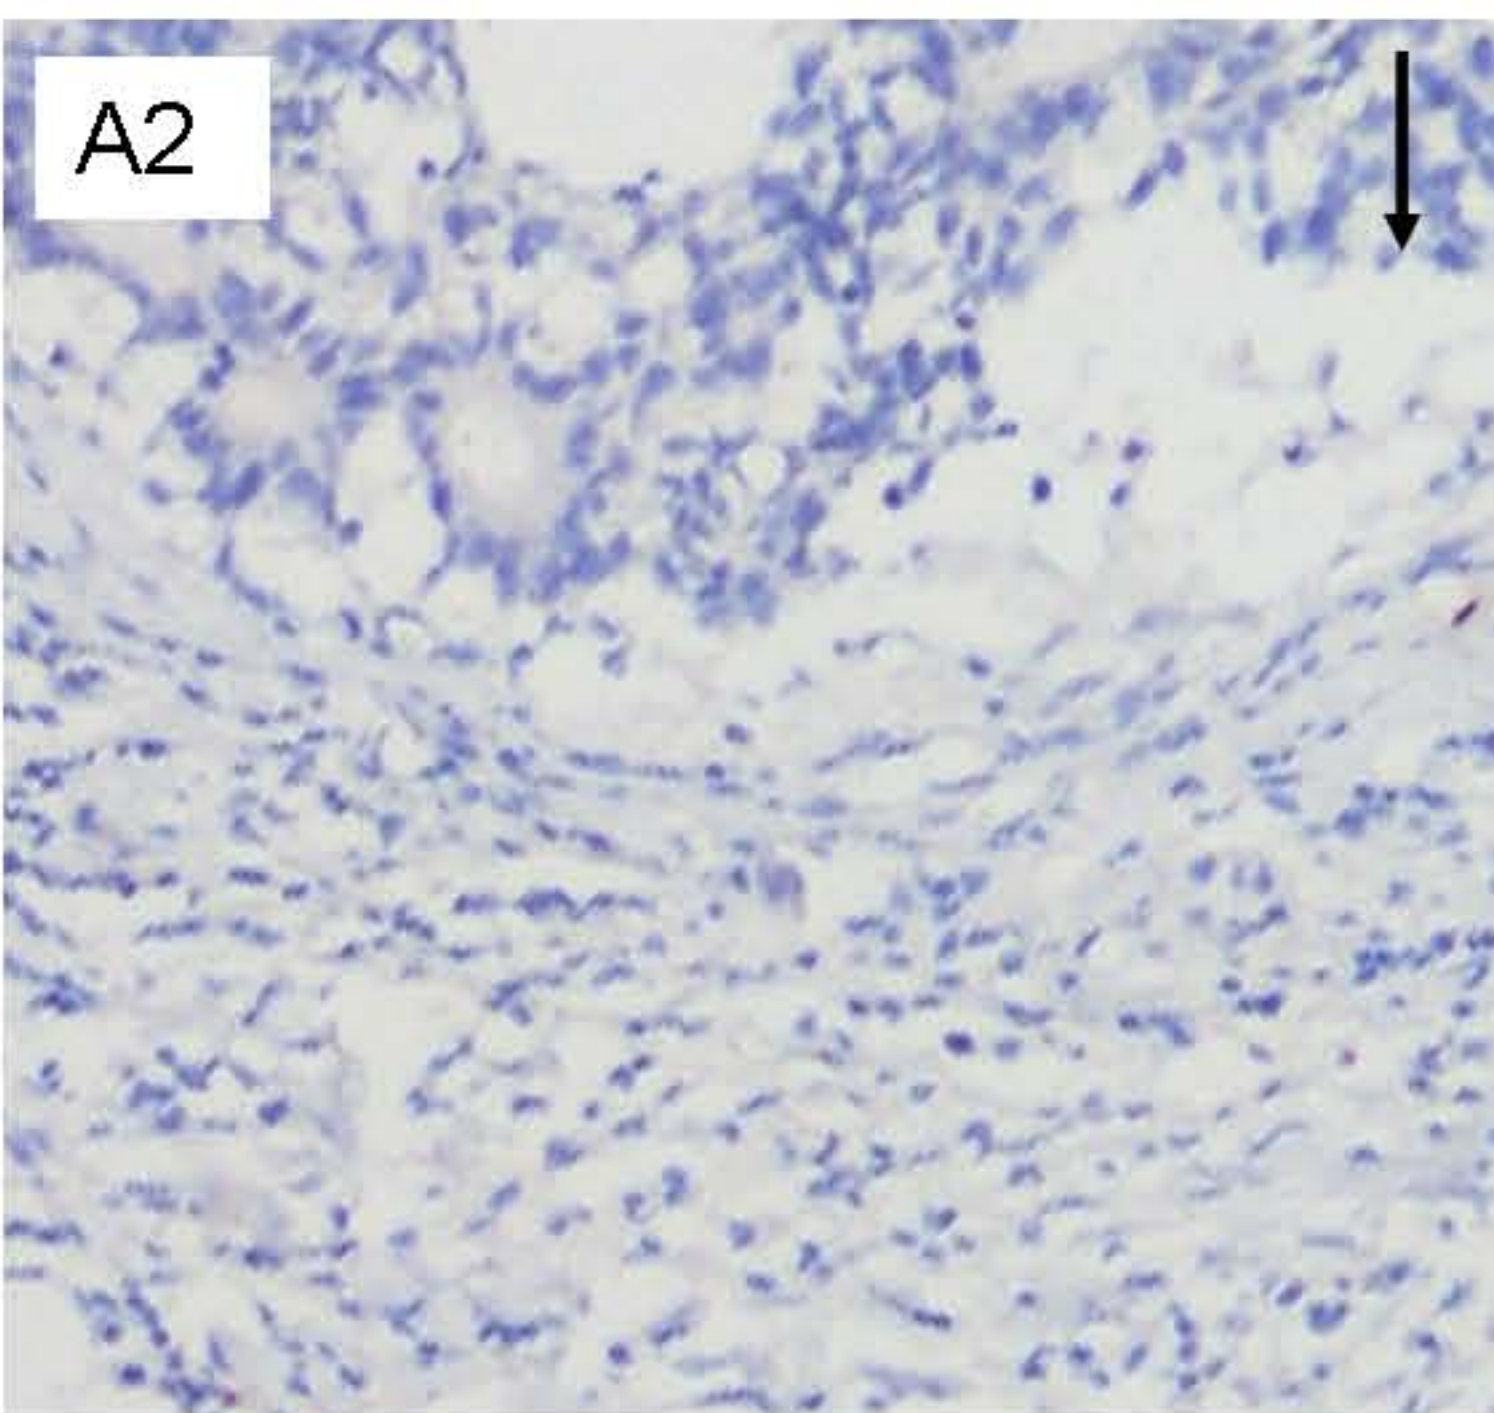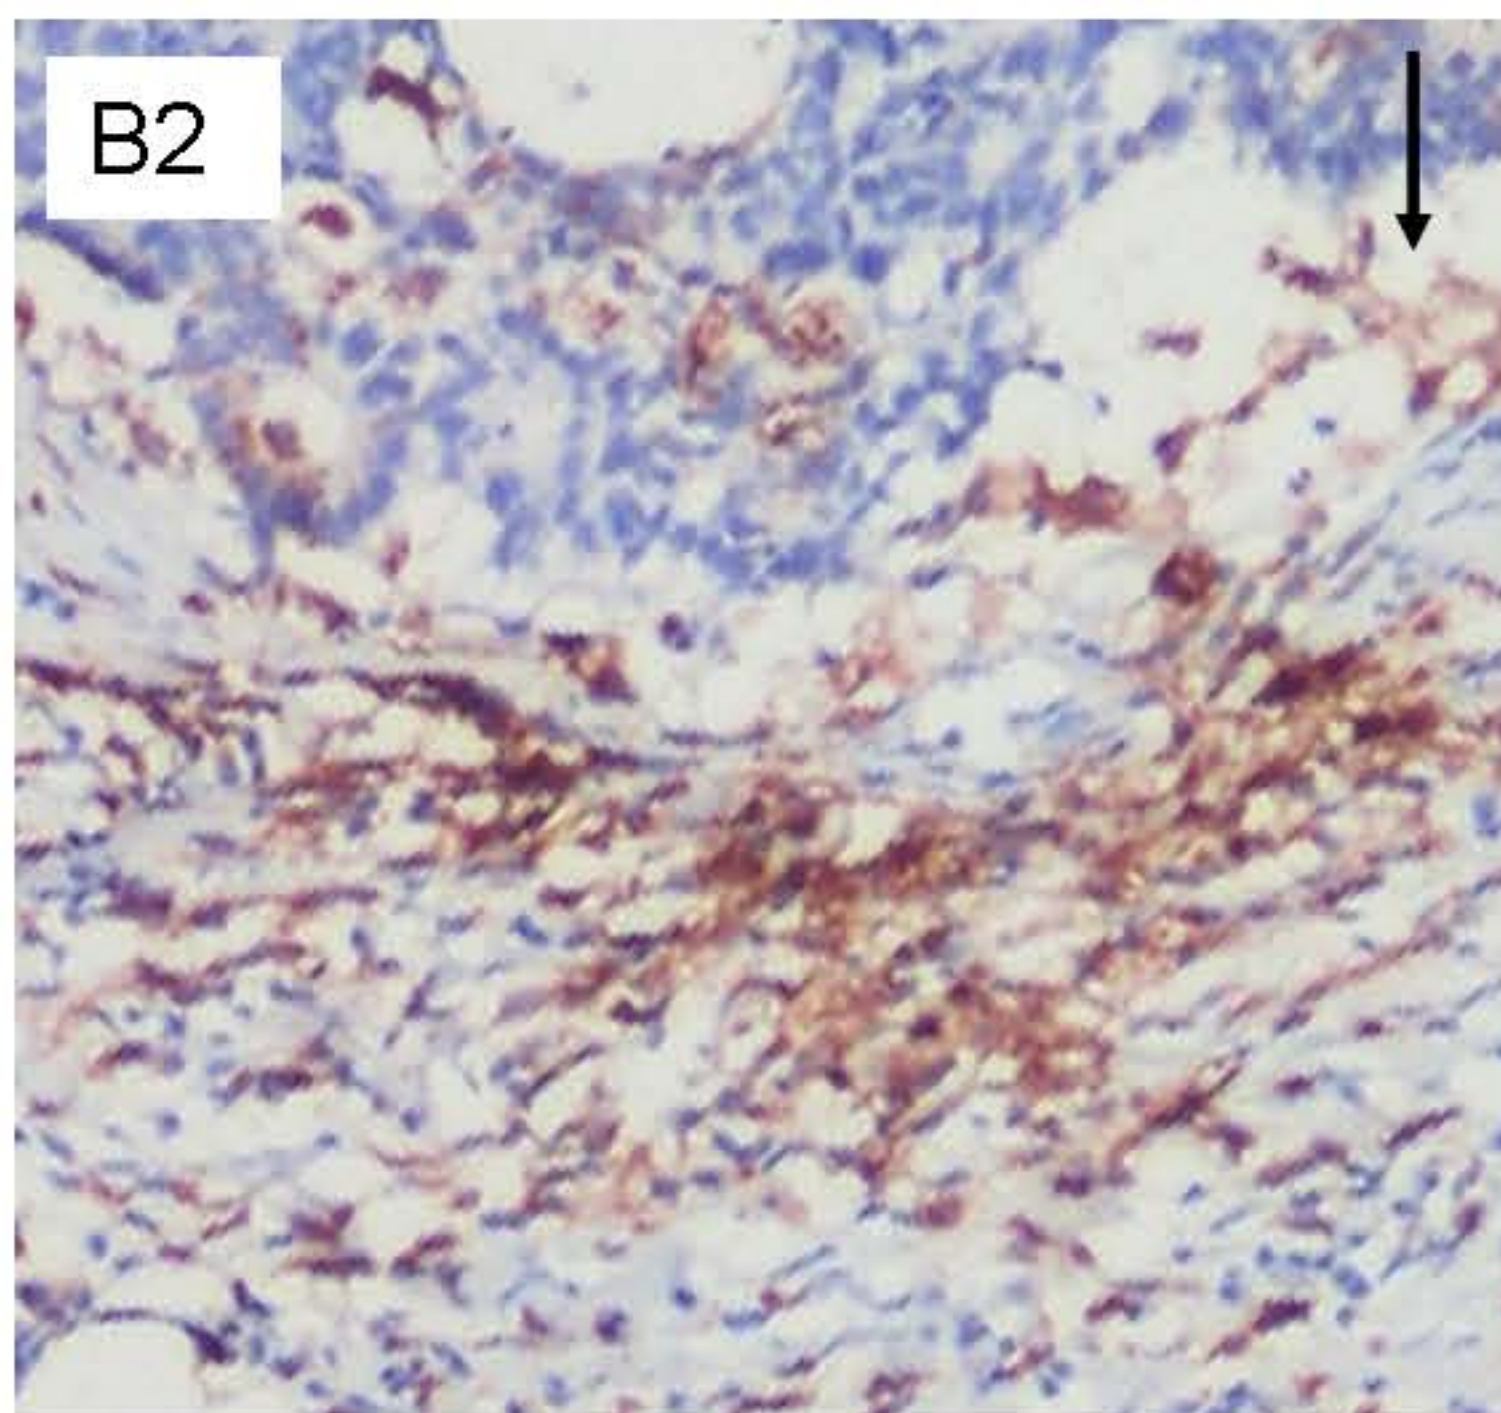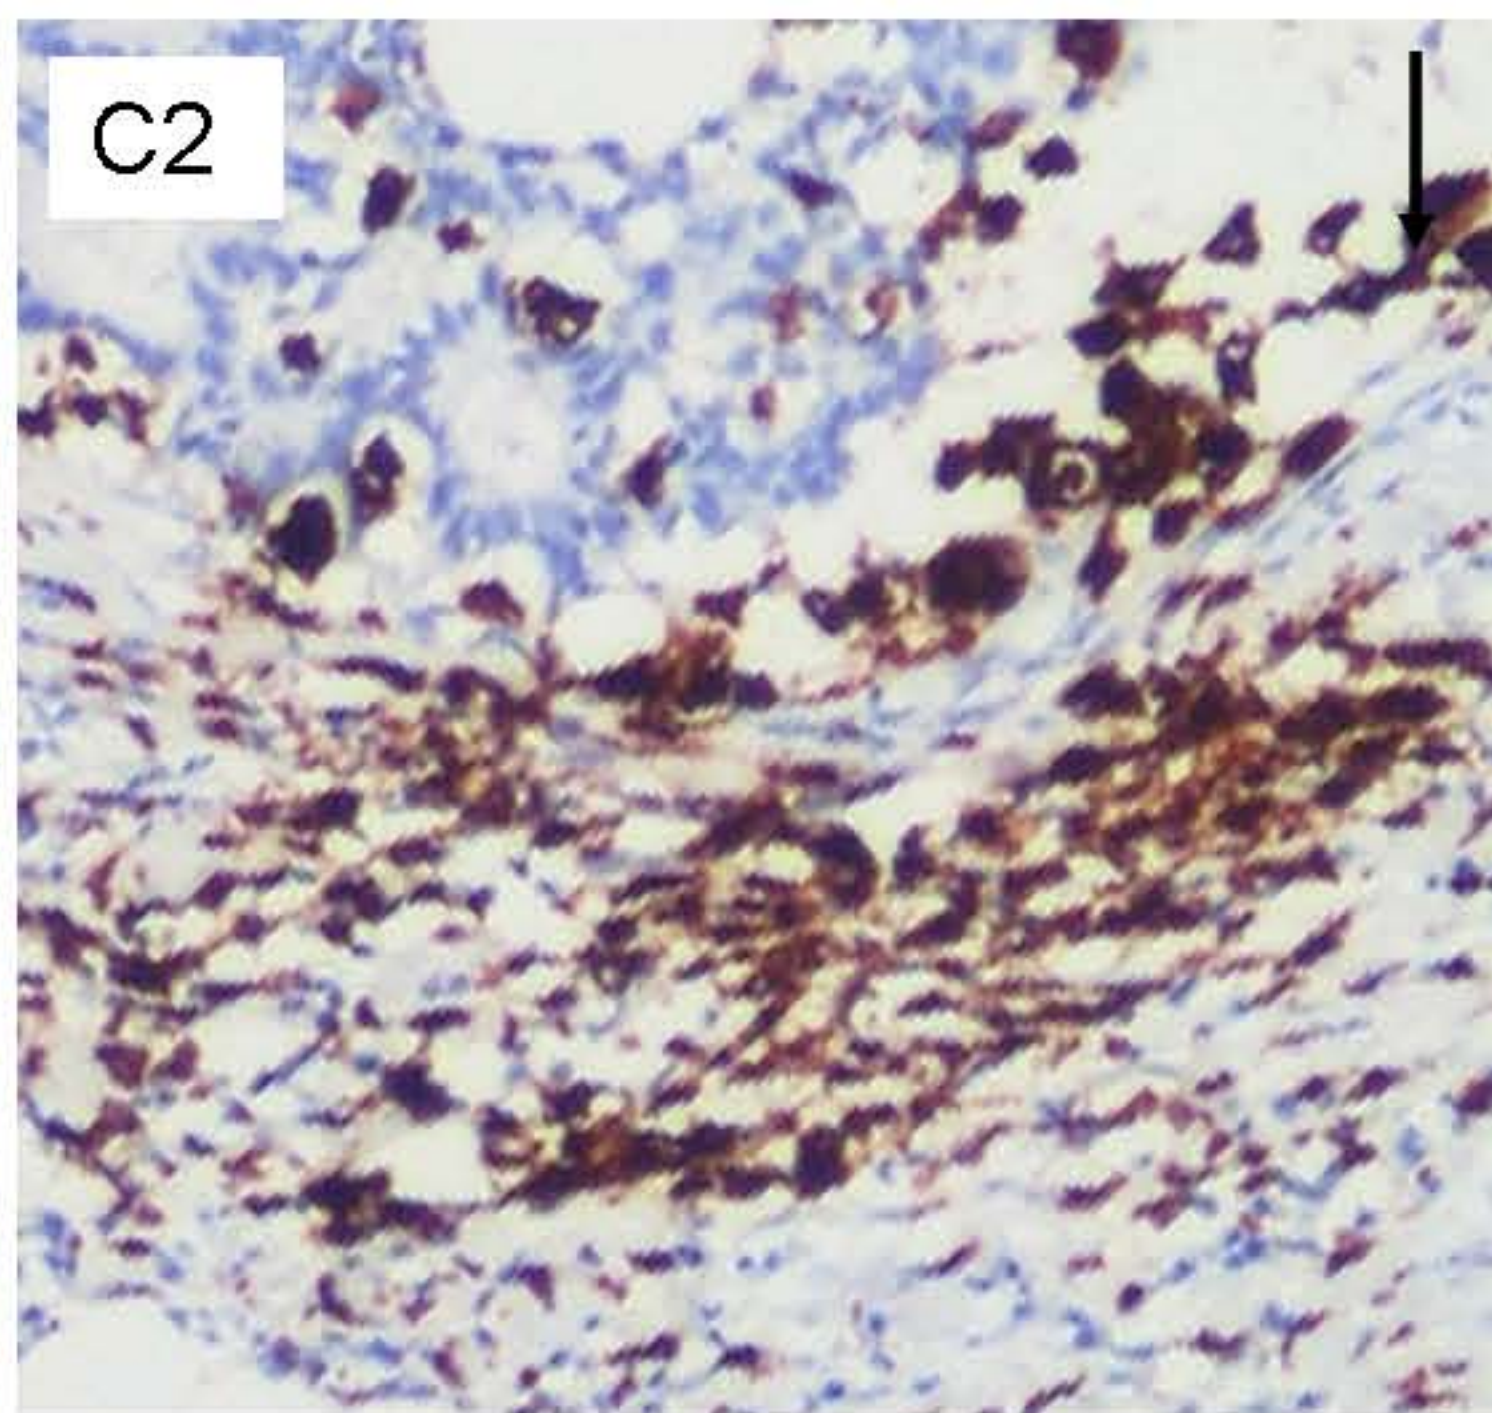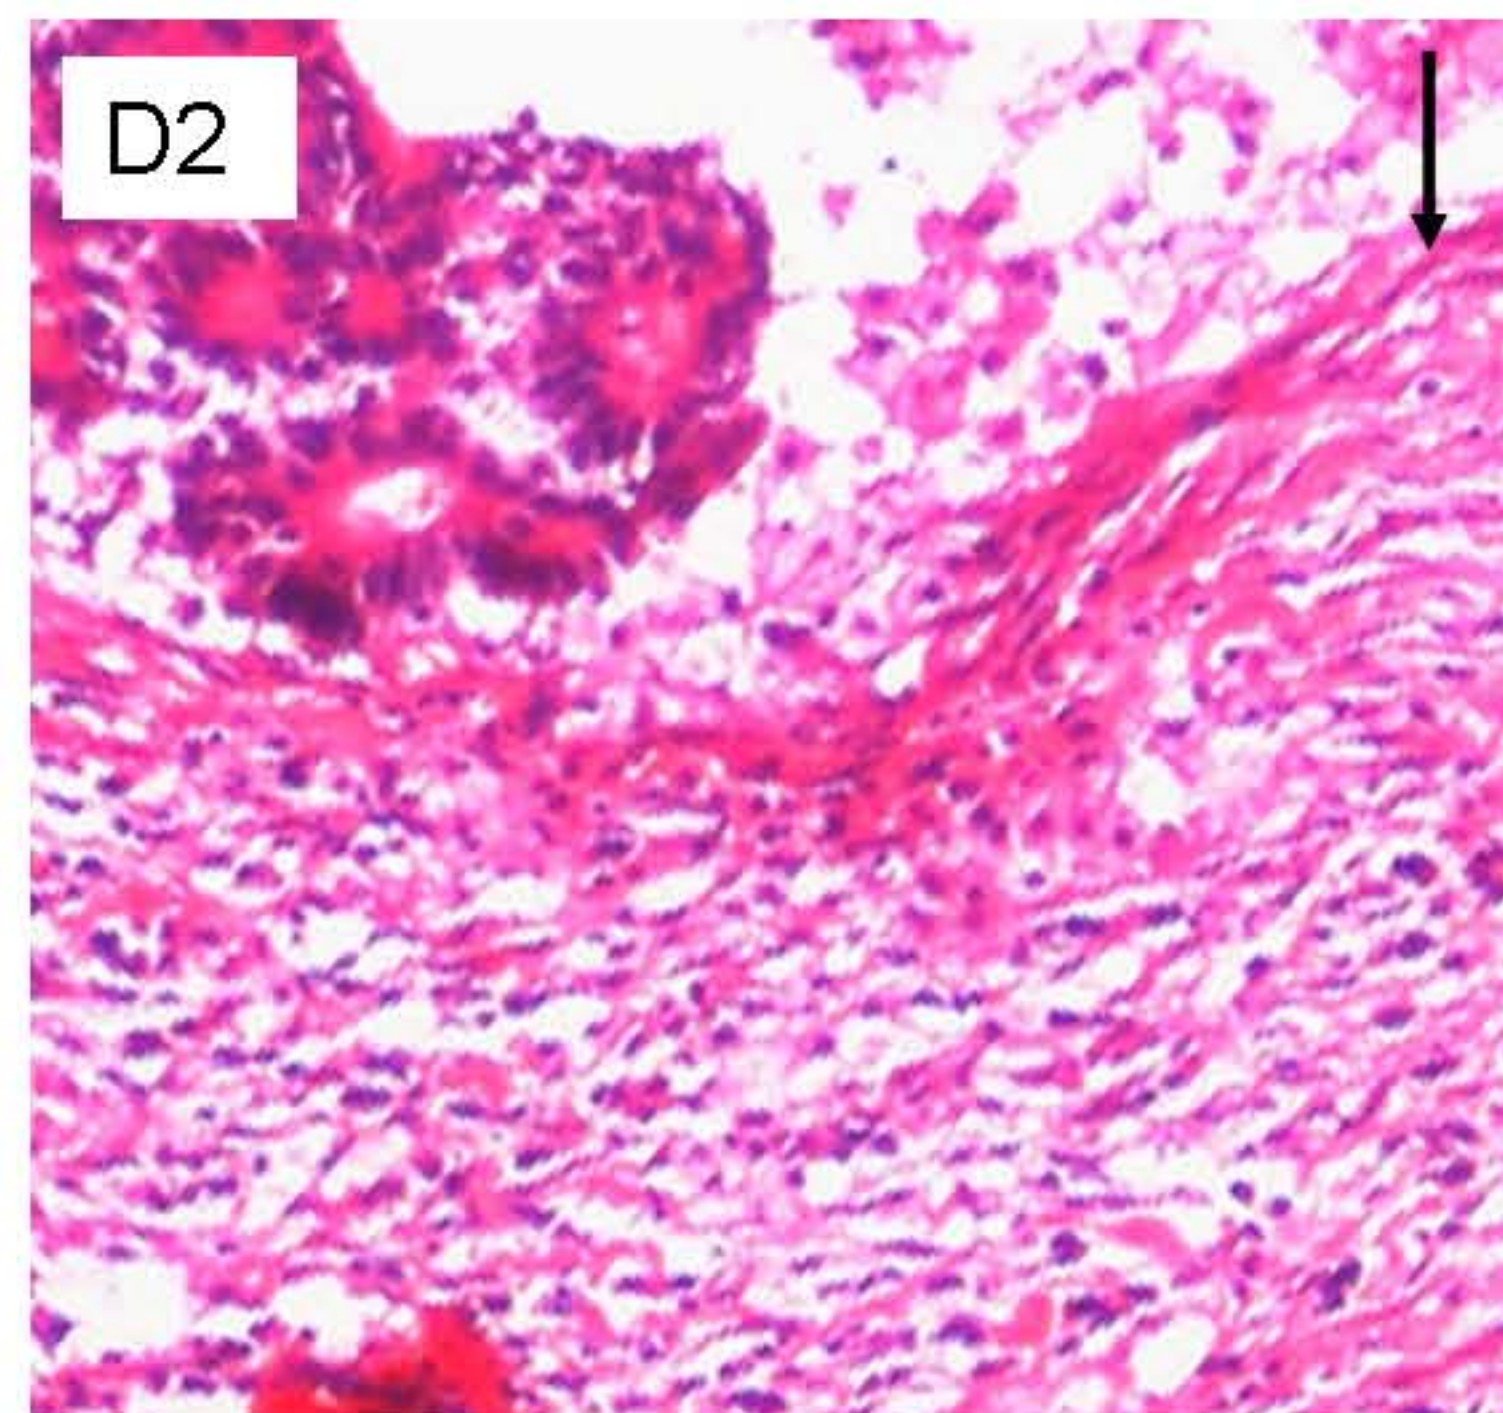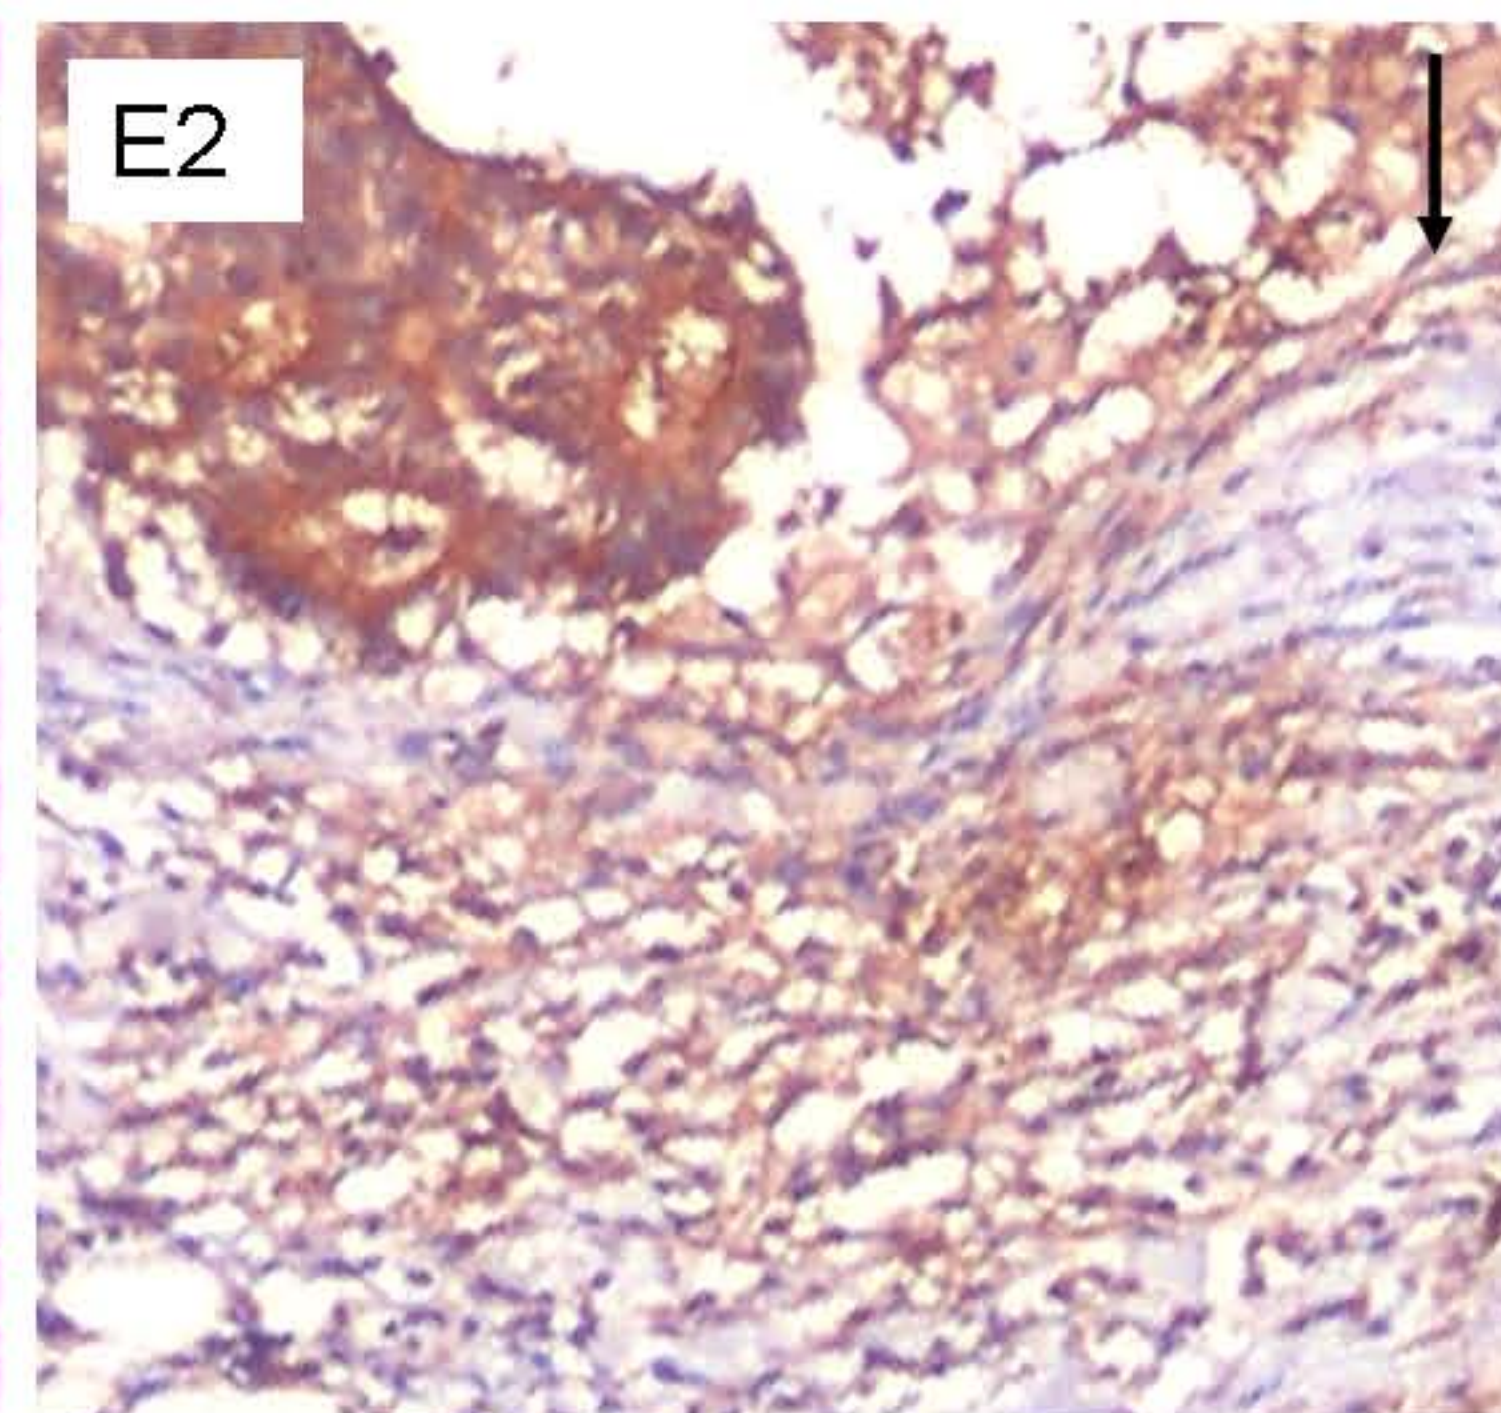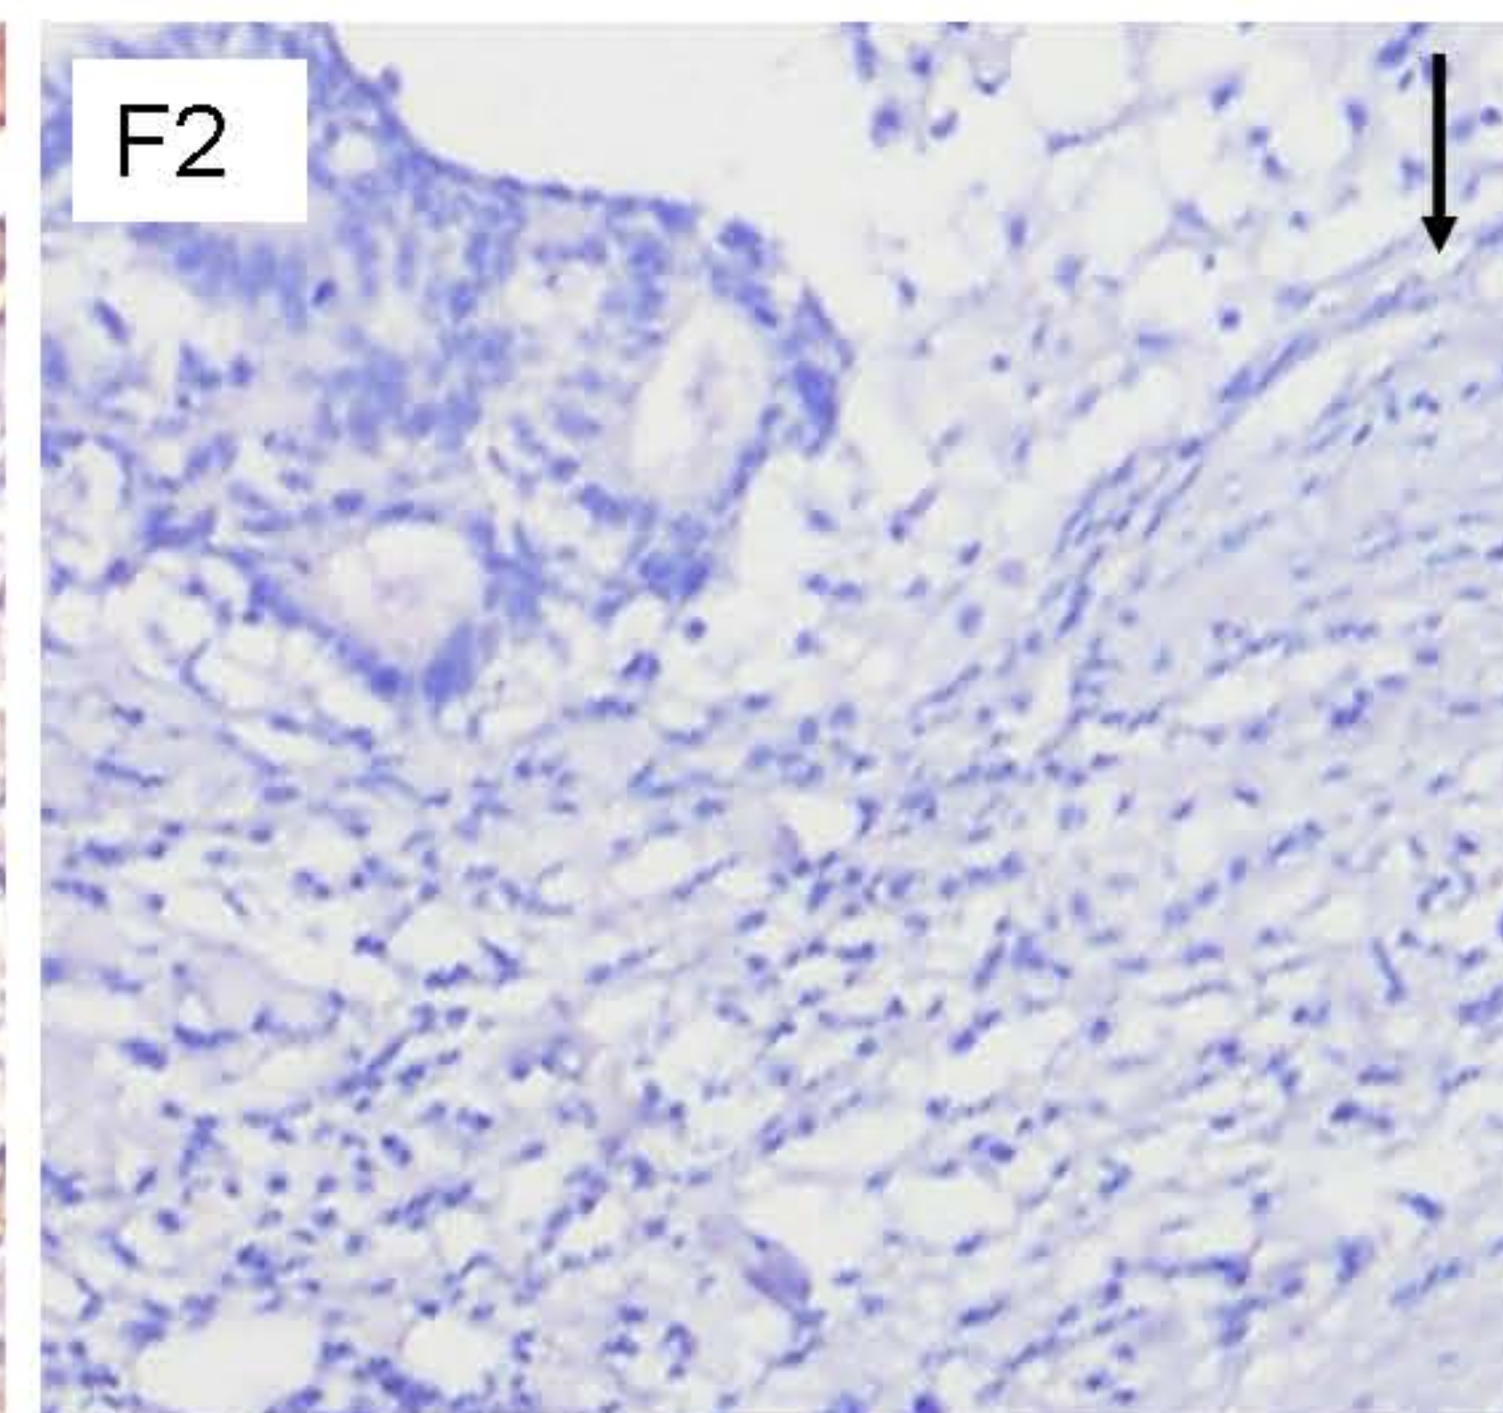**×200**

Supplement: MOESM2 [file 9576500]
